# Supplementary material
Source: Research Square preprint supplement (doi:10.21203/rs.3.rs-9954599/v1)
Supplement: Supplementary file 1 [file 5fdfcc12864871caa05b3aa7.docx]

| Question | very dissatisfied | dissatisfied | neutral | satisfied | very satisfied |
| --- | --- | --- | --- | --- | --- |
| 1. If I could decide again now whether to undergo orthodontic–orthognathic treatment, I would still choose surgical treatment. |  |  |  |  |  |
| 2.I am satisfied with my postoperative gingival and periodontal conditions. |  |  |  |  |  |
| 3. I would recommend orthodontic–orthognathic treatment to friends with similar dentofacial deformities. |  |  |  |  |  |
| 4.I would recommend orthodontic–orthognathic treatment to friends with similar dentofacial deformities. |  |  |  |  |  |
| 5.My relatives and friends accept (are satisfied with) my surgical outcome. |  |  |  |  |  |
| 6.My self-confidence has improved after surgery. |  |  |  |  |  |
| 7.I now feel more at ease when interacting with other people. |  |  |  |  |  |
| 8.I feel happier after surgery. |  |  |  |  |  |
| 9.I no longer pay excessive attention to my appearance as I did before surgery. |  |  |  |  |  |
| 10.I am satisfied with the improvement in my chewing function after surgery. |  |  |  |  |  |
| 11.Postoperative side effects do not affect my satisfaction with the surgery. |  |  |  |  |  |
